# Supplementary material for: Brain proteomic analysis implicates actin filament processes and injury response in resilience to Alzheimer’s disease
Source: Springer Nature journal article supplement (doi:10.1038/s41467-023-38376-x), 2023-05-12
Supplement: MOESM1 [file 41467_2023_38376_MOESM1_ESM.pdf]

# Supplementary Information

## Supplementary Tables

**Table S1.** Characteristics of study participants and samples.

|                                                                                                                                                                                                                                      |                              | Clinico-pathologic groups      |              |                                  | Total         |
|--------------------------------------------------------------------------------------------------------------------------------------------------------------------------------------------------------------------------------------|------------------------------|--------------------------------|--------------|----------------------------------|---------------|
|                                                                                                                                                                                                                                      |                              | HC                             | RAD          | ADD                              |               |
| Cohort summary                                                                                                                                                                                                                       | Unique number of individuals | 11                             | 12           | 20                               | 43            |
|                                                                                                                                                                                                                                      | Unique number of samples     | 37                             | 44           | 74                               | 155           |
|                                                                                                                                                                                                                                      | Age (yr; median, min-max)    | 88 (73 - 95)                   | 90 (78 - 98) | 85 (59 - 100)                    | 88 (59 - 100) |
|                                                                                                                                                                                                                                      | Sex (% Male)                 | 54.55%                         | 50.00%       | 60.00%                           | 55.81%        |
| Brain regions                                                                                                                                                                                                                        | CAUD (number of samples)     | 10                             | 10           | 18                               | 38            |
|                                                                                                                                                                                                                                      | HIPP (number of samples)     | 10                             | 11           | 20                               | 41            |
|                                                                                                                                                                                                                                      | IPL (number of samples)      | 8                              | 12           | 18                               | 38            |
|                                                                                                                                                                                                                                      | SMTG (number of samples)     | 9                              | 11           | 18                               | 38            |
|                                                                                                                                                                                                                                      |                              | Number of proteins             |              | Number of peptides               |               |
| Regional proteomics data                                                                                                                                                                                                             | CAUD                         | 4,635                          |              |                                  | 26,123        |
|                                                                                                                                                                                                                                      | HIPP                         | 5,117                          |              |                                  | 31,863        |
|                                                                                                                                                                                                                                      | IPL                          | 6,099                          |              |                                  | 42,492        |
|                                                                                                                                                                                                                                      | SMTG                         | 5,851                          |              |                                  | 40,342        |
|                                                                                                                                                                                                                                      | Total                        | 7,115 (unique), 3,964 (shared) |              | 56,073 (unique), 19,218 (shared) |               |
| Abbreviations: HC for healthy control, RAD for resilience to AD, ADD for Alzheimer's disease and dementia, CAUD for Caudate, HIPP for Hippocampus, IPL for Inferior parietal lobule, and SMTG for superior and middle temporal gyri. |                              |                                |              |                                  |               |

**Table S2.** The criteria for clinicopathologic groups for the current study and datasets used for external validation are summarized. Note that unlike the external validation datasets, the current study explicitly excluded\*: cases with any LB or LATE-NC other than amygdala, >2 microinfarcts or microhemorrhages, any territorial or lacunar infarcts, any hemorrhages, any HS, and any other neuropathologic features of the disease.

| Clinico-pathologic groups |                           | Clinical                     |                        |                                                |                      |
|---------------------------|---------------------------|------------------------------|------------------------|------------------------------------------------|----------------------|
|                           |                           | Dementia: No                 |                        | Dementia: Yes                                  |                      |
|                           |                           | Current Study                | External Validations   | Current Study                                  | External Validations |
| Pathological              | Not ADNC                  | Healthy Control (HC)*        | Control (Ctrl)         | Excluded<br>(Causes of dementia other than AD) |                      |
|                           | Low ADNC                  | Excluded<br>(Preclinical AD) |                        |                                                |                      |
|                           | Intermediate or High ADNC | Resilient to AD (RAD)*       | Asymptomatic (Asym) AD | ADD*                                           | ADD                  |

**Table S3.** The Chi-square test compares the intermediate and high Alzheimer's disease neuropathologic change (ADNC) between RAD and ADD groups.

|                                 | <b>Intermediate ADNC</b> | <b>High ADNC</b> |
|---------------------------------|--------------------------|------------------|
| RAD group                       | 5                        | 7                |
| ADD group                       | 4                        | 16               |
| Chi-square test P-value = 0.19. |                          |                  |

**Table S4.** Cohort metadata and clinico-pathologic groups. Note: \*DSM-IVR criteria. ^NIA-AA ADNC score. Criteria for including only clinically insignificant levels of four common comorbidities were: (i) No territorial or lacunar infarcts, no hemorrhages, <2 microinfarcts; (ii) No LBs or LB in amygdala only; (iii) No LATE-NC or LATE-NC in amygdala only; (iv) No hippocampal sclerosis in the unilateral hippocampus available for histopathologic analysis. Additional potential identifiers such as APOE ε4 allele and postmortem interval (PMI) were collected but are not shown here.

| Individual | Group | Age | Sex        | Diagnosis*  | ADNC Score^       | A Score | B Score | C Score | Thal phase | Braak stage | CERAD score              | CAUD | HIPP | IPL | SMTG |
|------------|-------|-----|------------|-------------|-------------------|---------|---------|---------|------------|-------------|--------------------------|------|------|-----|------|
| 1          | HC    | 73  | Male       | No dementia | Not ADNC          | 1       | 1       | 0       | 1 (A1)     | II          | No neuritic plaques (C0) | yes  | yes  | no  | no   |
| 2          | HC    | 78  | Male       | No dementia | Not ADNC          | 1       | 0       | 0       | 1          | 0           | No neuritic plaques (C0) | yes  | no   | no  | no   |
| 3          | HC    | 79  | Female     | No dementia | Not ADNC          | 1       | 1       | 0       | 1          | II          | No neuritic plaques (C0) | yes  | yes  | no  | yes  |
| 4          | HC    | 84  | Male       | No dementia | Not ADNC          | 1       | 1       | 0       | 2          | I           | No neuritic plaques (C0) | yes  | yes  | yes | yes  |
| 5          | HC    | 86  | Male       | No dementia | Not ADNC          | 1       | 2       | 0       | 2 (A1)     | III         | No neuritic plaques (C0) | yes  | yes  | yes | yes  |
| 6          | HC    | 88  | Female     | No dementia | Not ADNC          | 0       | 1       | 0       | 0 (A0)     | II          | No neuritic plaques (C0) | yes  | yes  | yes | yes  |
| 7          | HC    | 88  | Female     | No dementia | Not ADNC          | 1       | 2       | 0       | 2          | III         | No neuritic plaques (C0) | yes  | yes  | yes | yes  |
| 8          | HC    | 89  | Male       | No dementia | Not ADNC          | 0       | 1       | 0       | 0 (A0)     | I           | No neuritic plaques (C0) | yes  | yes  | yes | yes  |
| 9          | HC    | 90+ | Male       | No dementia | Not ADNC          | 1       | 2       | 0       | 2          | III         | No neuritic plaques (C0) | yes  | yes  | yes | yes  |
| 10         | HC    | 90+ | Female     | No dementia | Not ADNC          | 1       | 2       | 0       | 2          | IV          | No neuritic plaques (C0) | no   | yes  | yes | yes  |
| 11         | HC    | 90+ | Female     | No dementia | Not ADNC          | 3       | 2       | 0       | 4 (A3)     | IV          | No neuritic plaques (C0) | yes  | yes  | yes | yes  |
| 12         | RAD   | 78  | Male       | No dementia | Intermediate      | 3       | 2       | 2       | 4          | III         | Moderate (C2)            | no   | yes  | yes | no   |
| 13         | RAD   | 79  | Male       | No dementia | Intermediate      | 3       | 2       | 2       | 5          | III         | Moderate (C2)            | yes  | no   | yes | yes  |
| 14         | RAD   | 86  | Female     | No dementia | Intermediate      | 3       | 2       | 2       | 4          | IV          | Moderate (C2)            | yes  | yes  | yes | yes  |
| 15         | RAD   | 87  | Male       | No dementia | High              | 3       | 3       | 3       | 5 (A3)     | VI          | Frequent (C3)            | yes  | yes  | yes | yes  |
| 16         | RAD   | 89  | Female     | No dementia | High              | 2       | 3       | 3       | 3 (A2)     | V           | Frequent (C3)            | yes  | yes  | yes | yes  |
| 17         | RAD   | 89  | Female     | No dementia | High              | 3       | 3       | 3       | 5          | V           | Frequent (C3)            | no   | yes  | yes | yes  |
| 18         | RAD   | 90+ | Female     | No dementia | Intermediate      | 3       | 2       | 2       | 4          | III         | Moderate (C2)            | yes  | yes  | yes | yes  |
| 19         | RAD   | 90+ | Female     | No dementia | High              | 2       | 2       | 3       | 3 (A2)     | IV          | Frequent (C3)            | yes  | yes  | yes | yes  |
| 20         | RAD   | 90+ | Male       | No dementia | High              | 3       | 3       | 3       | 5 (A3)     | V           | Frequent (C3)            | yes  | yes  | yes | yes  |
| 21         | RAD   | 90+ | Male       | No dementia | High              | 2       | 3       | 2       | 3 (A2)     | V           | Moderate (C2)            | yes  | yes  | yes | yes  |
| 22         | RAD   | 90+ | Female     | No dementia | Intermediate      | 3       | 2       | 3       | 4 (A3)     | III         | Frequent (C3)            | yes  | yes  | yes | yes  |
| 23         | RAD   | 90+ | Male       | No dementia | High              | 3       | 3       | 2       | 5          | V           | Moderate (C2)            | yes  | yes  | yes | yes  |
| 24         | ADD   | 59  | Male       | Dementia    | High              | 3       | 3       | 3       | 5          | VI          | Frequent (C3)            | yes  | yes  | yes | yes  |
| 25         | ADD   | 61  | Male       | Dementia    | High              | 3       | 3       | 3       | 5          | VI          | Frequent (C3)            | yes  | yes  | yes | yes  |
| 26         | ADD   | 62  | Male       | Dementia    | High              | 3       | 3       | 3       | 5 (A3)     | VI          | Frequent (C3)            | no   | yes  | yes | yes  |
| 27         | ADD   | 63  | Male       | Dementia    | High              | 3       | 3       | 3       | 5          | VI          | Frequent (C3)            | yes  | yes  | yes | yes  |
| 28         | ADD   | 67  | Female     | Dementia    | High              | 3       | 3       | 3       | 5          | VI          | Frequent (C3)            | yes  | yes  | yes | yes  |
| 29         | ADD   | 76  | Male       | Dementia    | High              | 3       | 3       | 3       | 5          | V           | Frequent (C3)            | yes  | yes  | yes | no   |
| 30         | ADD   | 77  | Male       | Dementia    | High              | 2       | 3       | 3       | 3 (A2)     | VI          | Frequent (C3)            | yes  | yes  | yes | yes  |
| 31         | ADD   | 78  | Female     | Dementia    | Intermediate      | 3       | 3       | 2       | 5          | V           | Moderate (C2)            | yes  | yes  | yes | no   |
| 32         | ADD   | 85  | Male       | Dementia    | High              | 3       | 3       | 3       | 4          | VI          | Frequent (C3)            | yes  | yes  | yes | yes  |
| 33         | ADD   | 85  | Female     | Dementia    | Intermediate      | 3       | 3       | 2       | 4          | VI          | Moderate (C2)            | yes  | yes  | yes | yes  |
| 34         | ADD   | 86  | Male       | Dementia    | High              | 3       | 3       | 3       | 5          | V           | Frequent (C3)            | yes  | yes  | yes | yes  |
| 35         | ADD   | 87  | Female     | Dementia    | High              | 3       | 3       | 3       | 5          | VI          | Frequent (C3)            | yes  | yes  | yes | yes  |
| 36         | ADD   | 88  | Male       | Dementia    | High              | 3       | 3       | 3       | 5          | VI          | Frequent (C3)            | yes  | yes  | no  | yes  |
| 37         | ADD   | 89  | Female     | Dementia    | Intermediate      | 3       | 3       | 2       | 5          | VI          | Moderate (C2)            | yes  | yes  | yes | yes  |
| 38         | ADD   | 90+ | Female     | Dementia    | High              | 3       | 3       | 3       | 5          | V           | Frequent (C3)            | yes  | yes  | no  | yes  |
| 39         | ADD   | 90+ | Female     | Dementia    | High              | 3       | 3       | 3       | 5          | VI          | Frequent (C3)            | yes  | yes  | yes | yes  |
| 40         | ADD   | 90+ | Male       | Dementia    | Intermediate      | 3       | 3       | 2       | 4          | V           | Moderate (C2)            | yes  | yes  | yes | yes  |
| 41         | ADD   | 90+ | Female     | Dementia    | High              | 3       | 3       | 3       | 4          | VI          | Frequent (C3)            | yes  | yes  | yes | yes  |
| 42         | ADD   | 90+ | Male       | Dementia    | High              | 3       | 3       | 3       | 5 (A3)     | VI          | Frequent (C3)            | yes  | yes  | yes | yes  |
| 43         | ADD   | 90+ | Male       | Dementia    | High              | 3       | 3       | 3       | 4          | V           | Frequent (C3)            | no   | yes  | yes | yes  |
| Ratio      |       |     | 1F : 1.15M |             | 11 Not: 9 I: 23 H |         |         |         |            |             |                          |      |      |     |      |
| Mean       |       | 85  |            |             |                   |         |         |         |            |             |                          |      |      |     |      |
| SD         |       | 10  |            |             |                   |         |         |         |            |             |                          |      |      |     |      |

## Supplementary Figures

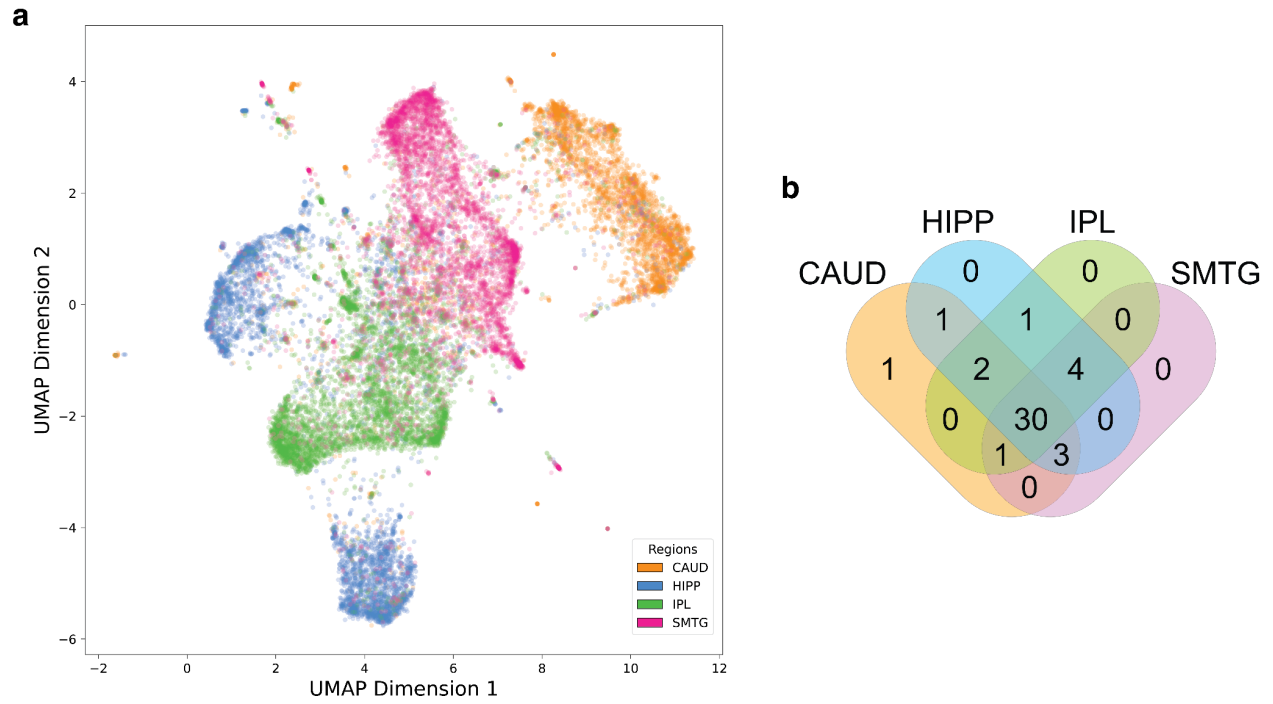

**Figure S1.** Additional proteomic features. **(a)** UMAP plot of detected protein expressions across four brain regions from the 43 individuals. **(b)** Venn diagram of available individuals among four brain regions. 30 out of 43 individuals had proteomic data across four brain regions.

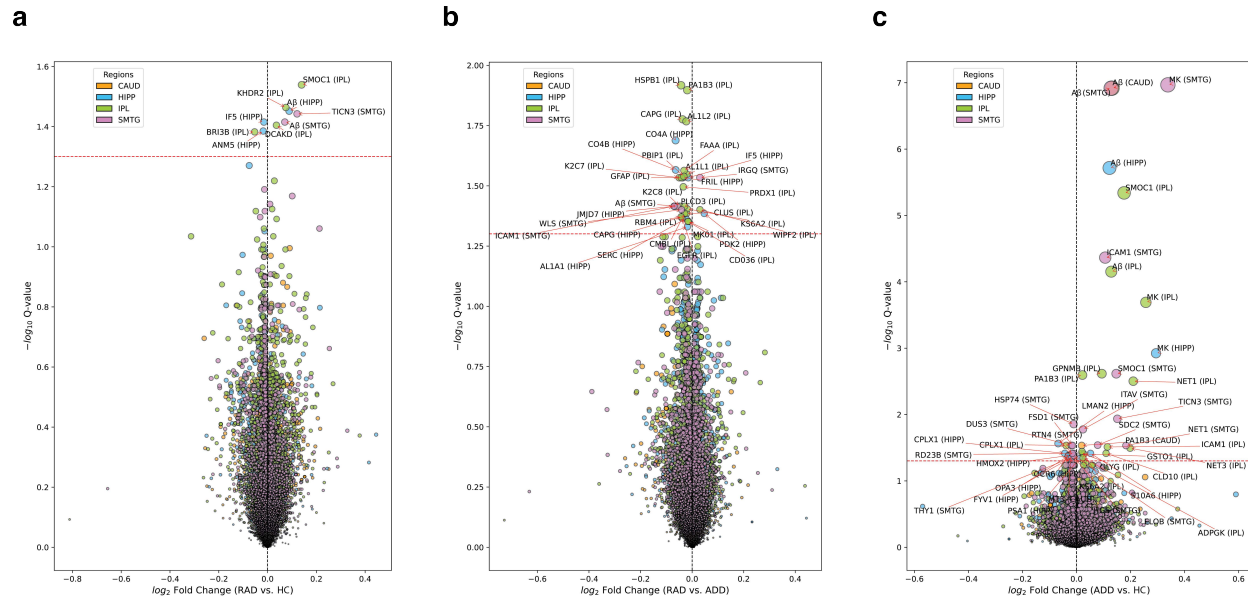

**Figure S2.** Volcano plot of proteins from four brain regions. **(a)** RAD vs. HC; **(b)** RAD vs. ADD; and **(c)** ADD vs. HC. Two-sided Student's t-test was used to derive the P-values, and Q-values stand for adjusted P-values by Benjamin-Hochberg procedure (FDR=0.05). The dashed red lines are adjusted P-value = 0.05. The circle size stands for  $-\log_{10}(\text{adjusted P-value})$ . Most proteins were differentially expressed between RAD vs. ADD and HC vs. ADD. Most significantly differentially expressed proteins between RAD vs. ADD were lower in the RAD group. Most significantly differentially expressed proteins between HC and ADD were lower in the HC group.

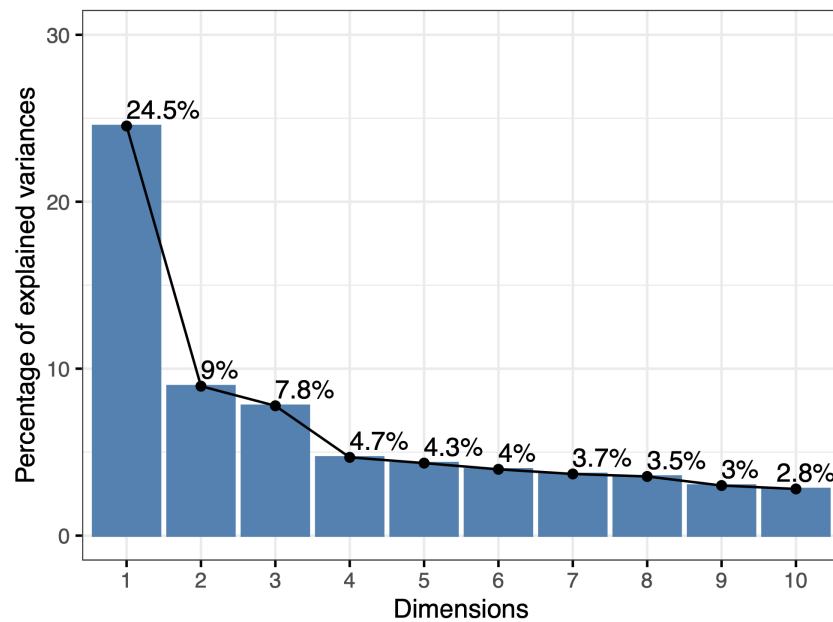

**Figure S3.** Percentage of explained variances from principal component analysis (PCA). PCA was performed with 33 RAD DEPs in all 4 brain regions (original dimension:  $33 \times 4 = 132$ ).

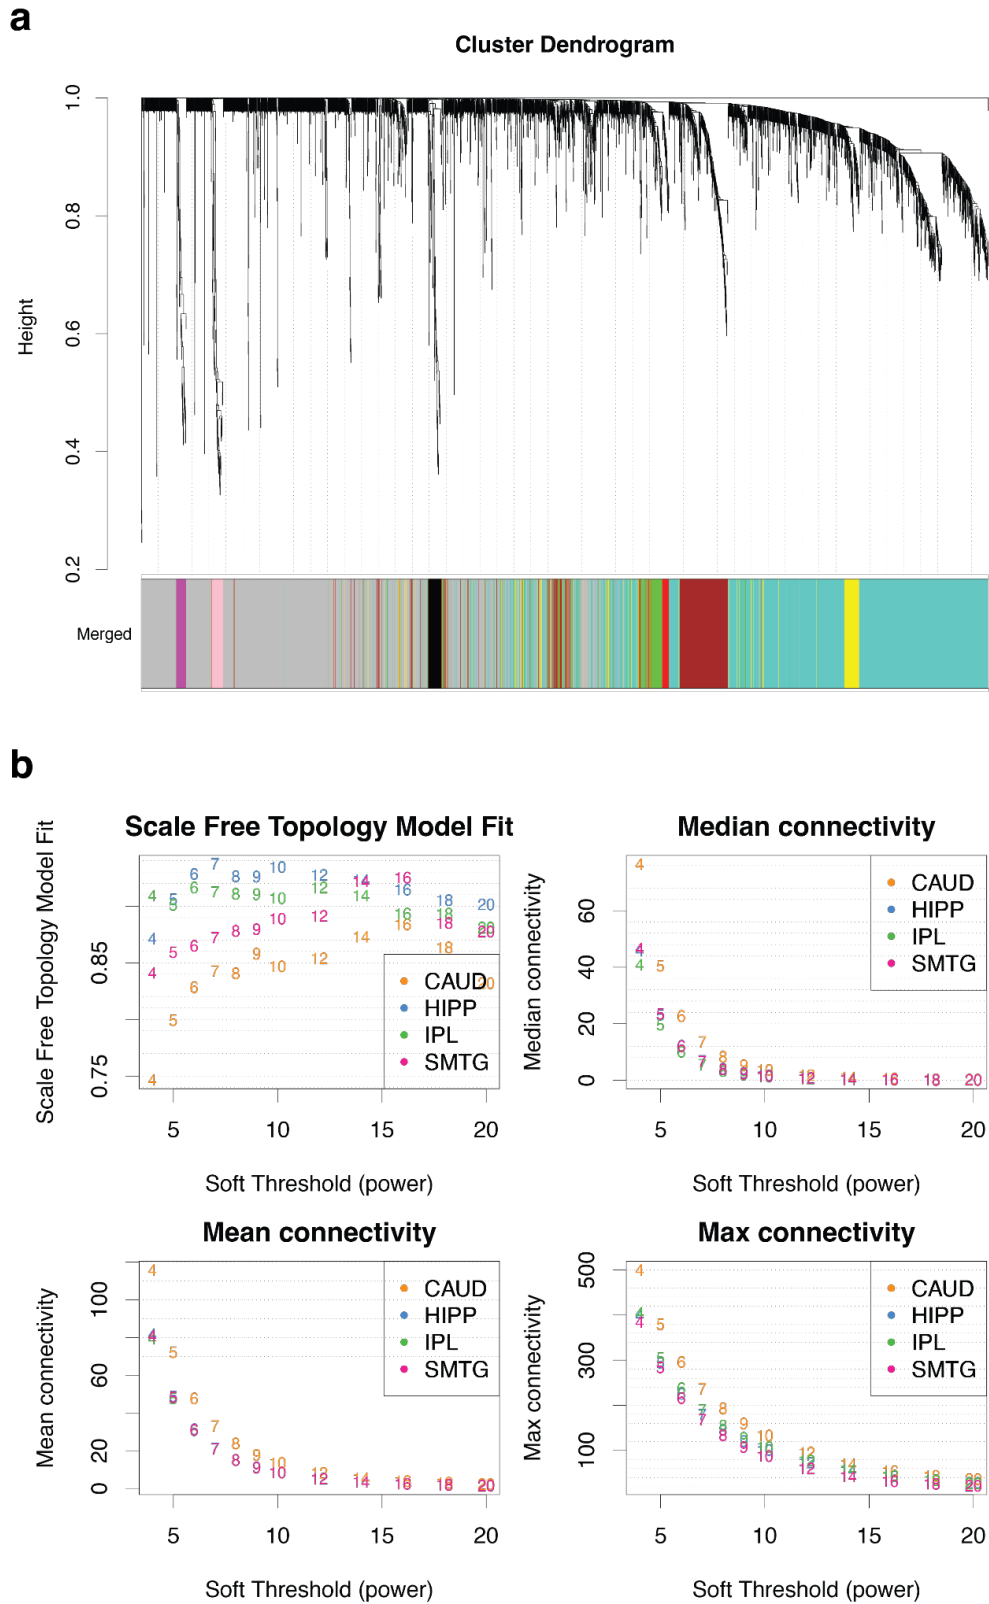

**Figure S4.** Additional results from the WGCNA co-expression network analysis. **(a)** WGCNA co-expression network cluster dendrogram. **(b)** WGCNA soft threshold vs. scale-free topology, median, mean, and max connectivity.

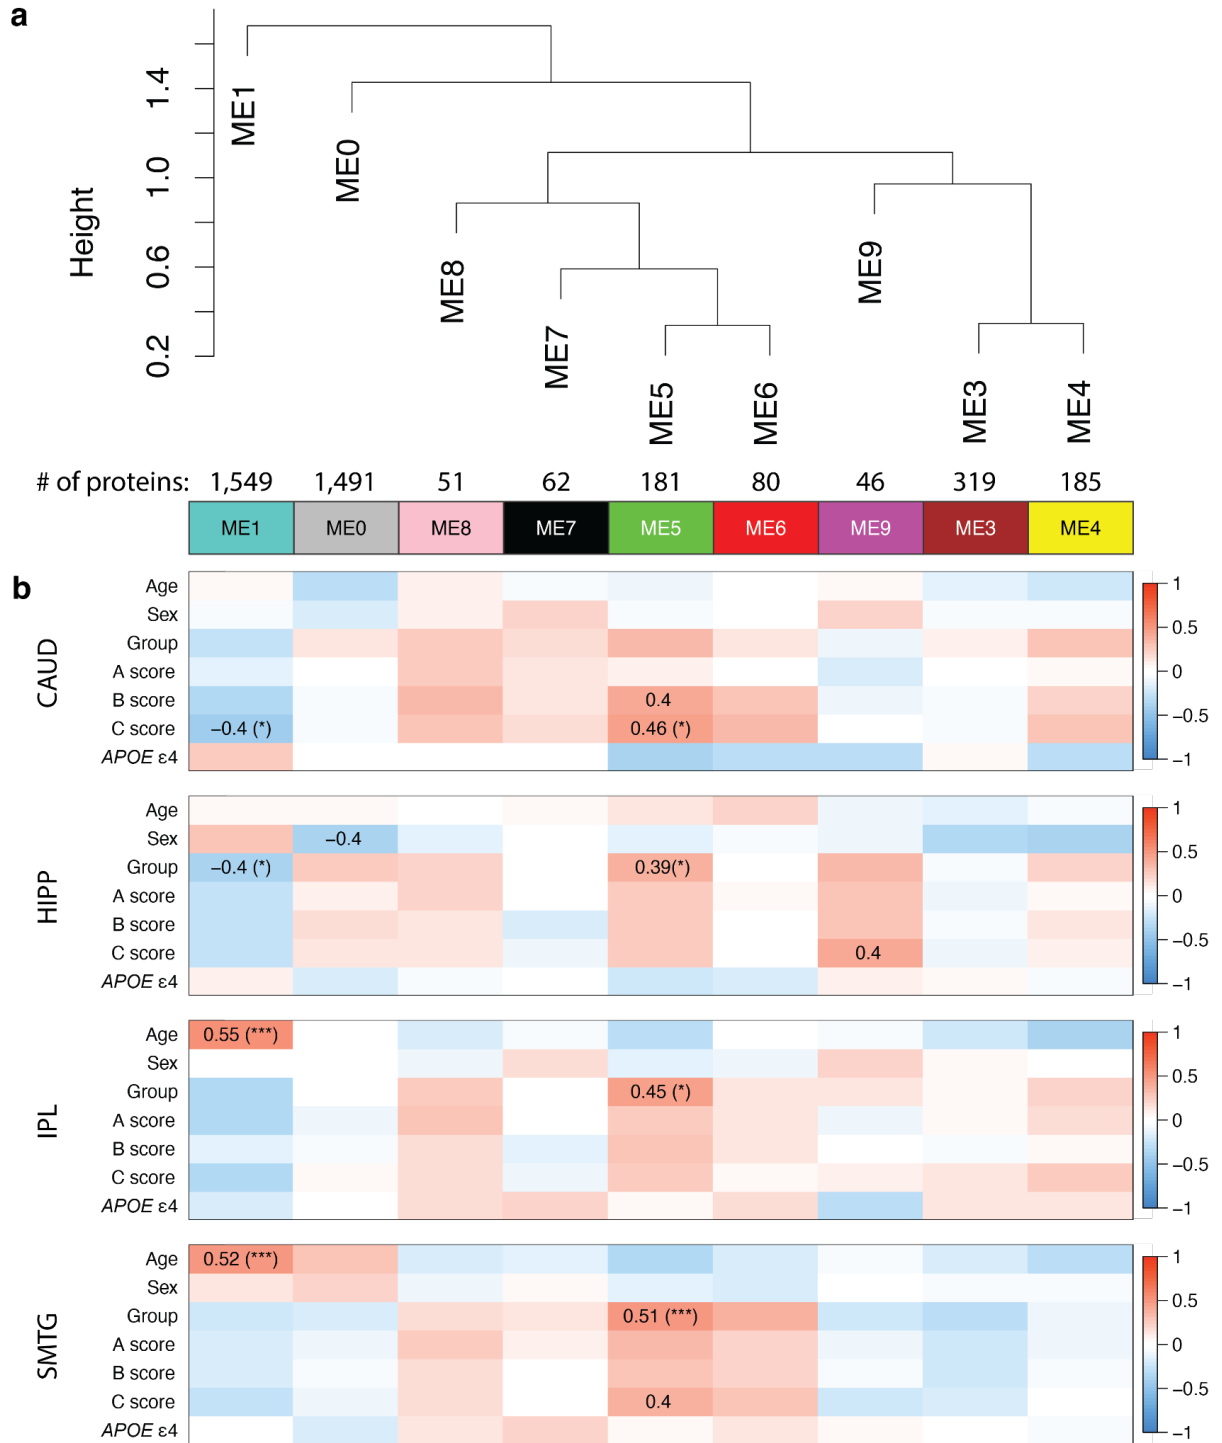

**Figure S5.** Consensus protein co-expression analysis results with important markers. **(a)** Consensus protein co-expression analysis developed 9 modules across four brain regions. **(b)** Pearson correlation with two-sided P-values was used to evaluate the relationships between different features and eigenprotein expression (threshold =  $\pm 0.4$  was used to display correlation values if the P-value is not significant). All P-values were adjusted by the Benjamini-Hochberg procedure (FDR cut-off = 0.05). Annotations: \* Adjusted P-value < 0.05; \*\* Adjusted P-value < 0.01, \*\*\* Adjusted P-value < 0.001. Source data are provided as a Source Data file.

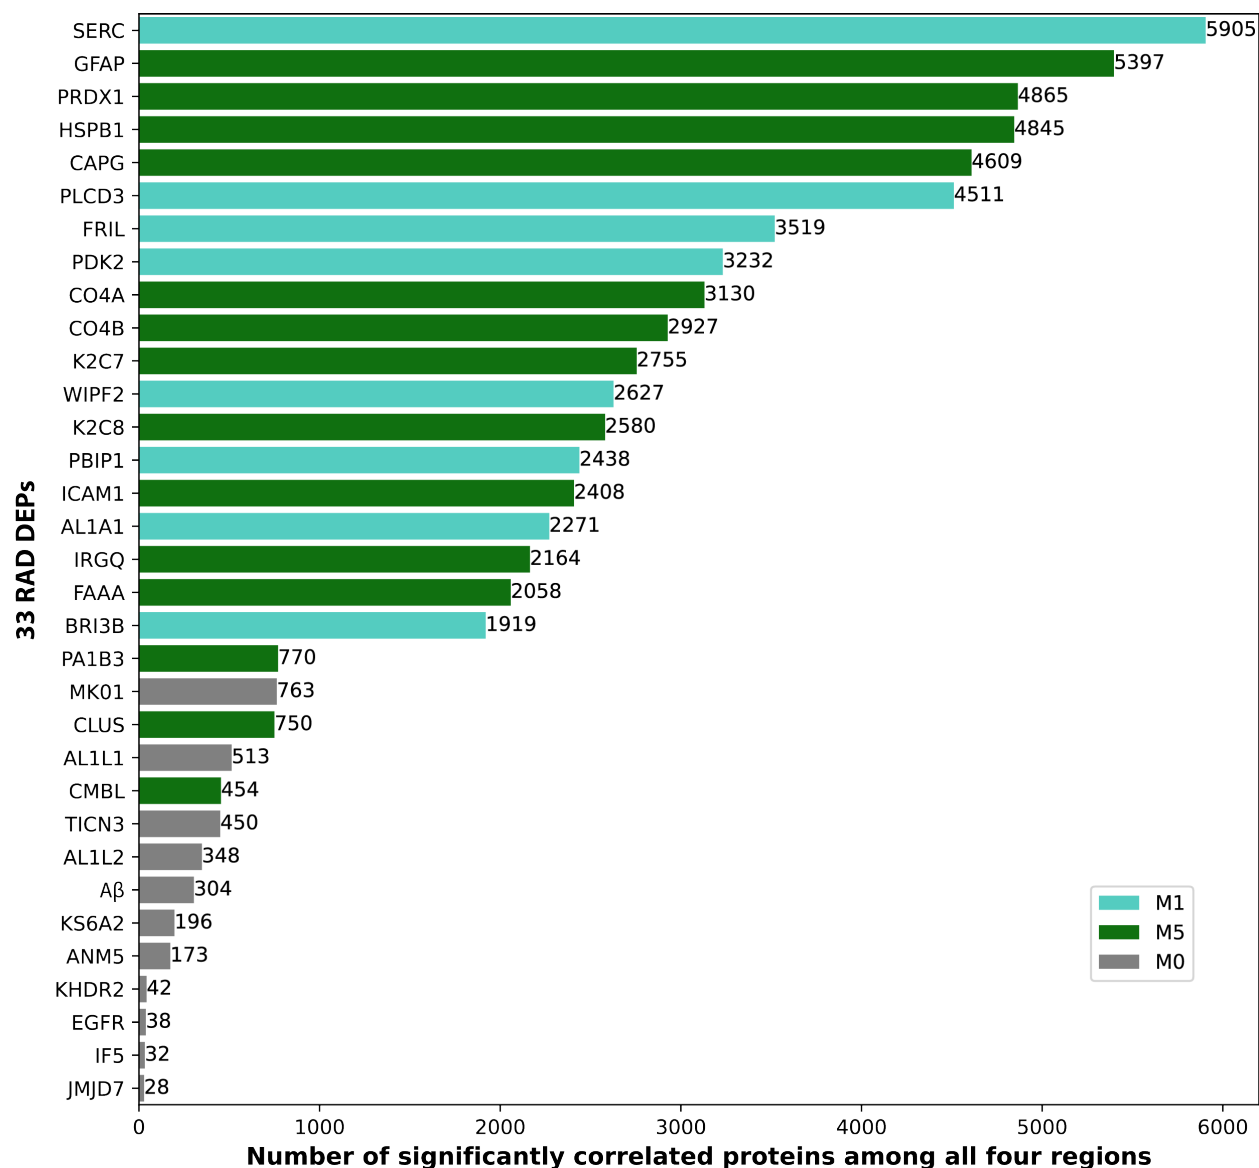

**Figure S6.** The 33 RAD DEPs were sorted in descending order based on the number of co-expressed proteins. Significance was determined by the P-values < 0.05 from the two-sided Spearman correlation tests. Proteins that were not commonly co-expressed with others were more likely to be attributed to M0 (unassigned module).

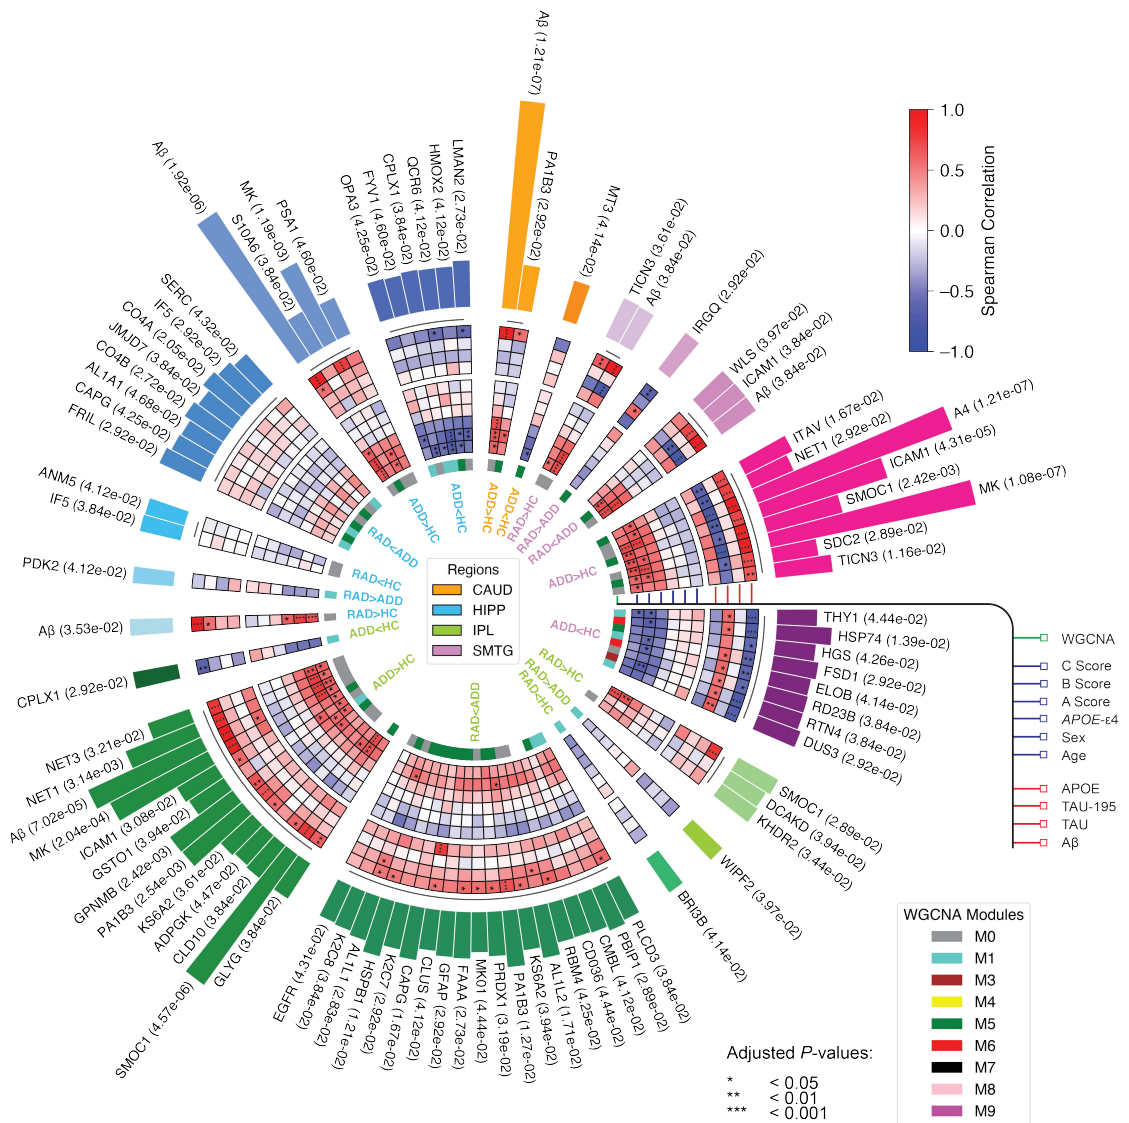

**Figure S7.** 85 differentially expressed proteins in at least one of the four brain regions. Comparisons include RAD vs. HC, RAD vs. ADD, and ADD vs. HC. Circles from outer rings to inner rings: (i) two-sided Student's t-test adjusted P-value; (ii) spearman correlations with two-sided P-values for four hallmark proteins; (iii) spearman correlations with two-sided P-values with individual features; and (iv) associated WGCNA modules. All P-values were adjusted using the Benjamin-Hochberg procedure (FDR=0.05). Annotations: \* Adjusted P-value < 0.05; \*\* Adjusted P-value < 0.01, \*\*\* Adjusted P-value < 0.001.

### Connected primary genes:

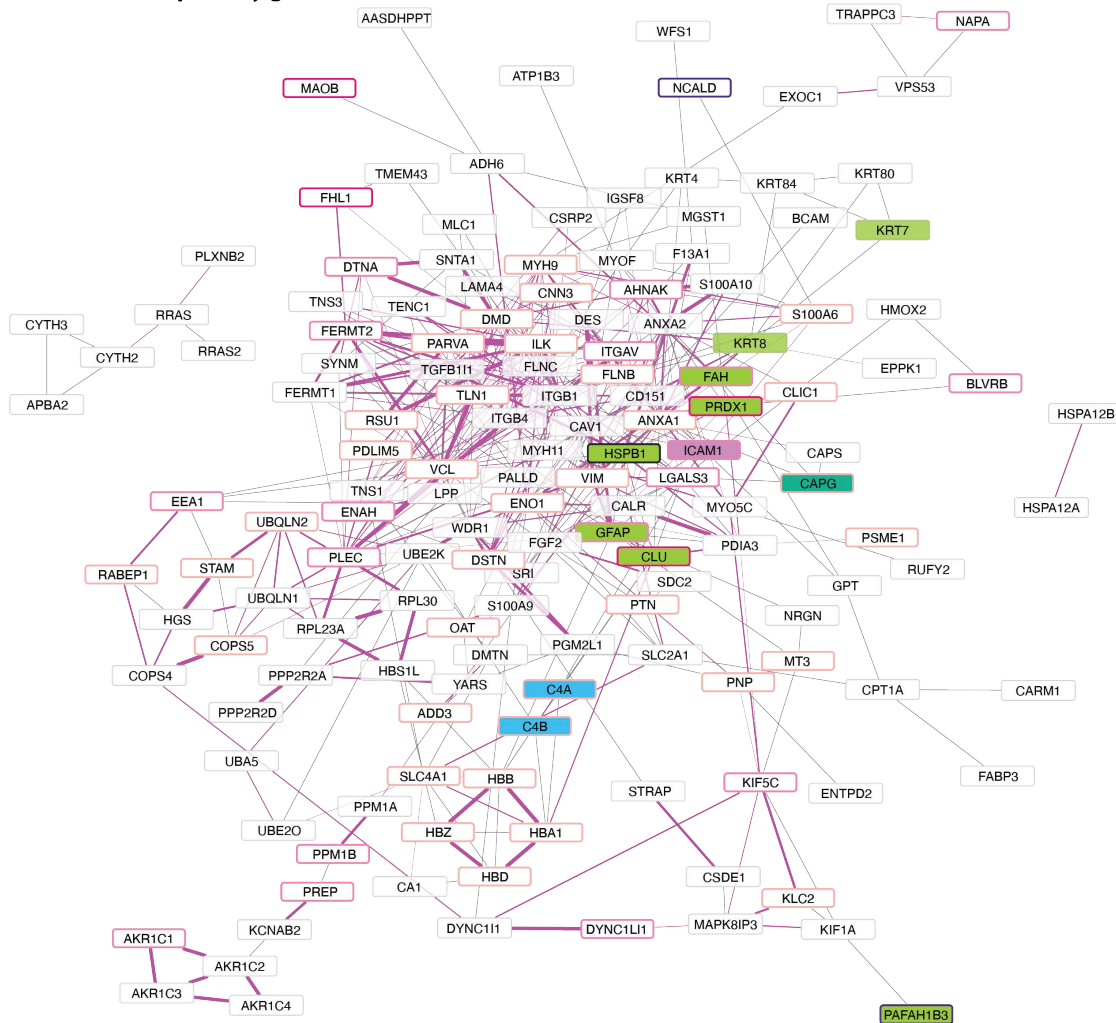

### Disconnected primary genes:

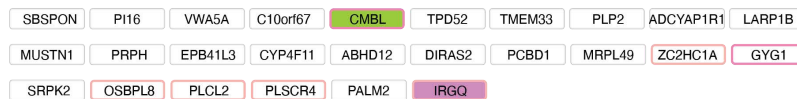

### Legend:

- : All interactions
- : Experimentally determined

Edge thickness  
(experimentally determined interaction score):  
Min = 0.0560; Max = 0.9980

RAD differentially expressed  
in study cohort regions:

- HIPP
- IPL
- HIPP + IPL
- SMTG

Total number of significant  
AsymAD vs. ADD or AsymAD vs. Ctrl  
in external cohorts:

- : 0
- : 1
- : 2
- : 3
- : 4
- : 5

**Figure S8.** Protein-protein interactions of module 5. Minimum required interaction combined score = 0.4 (default). Magenta-colored edges represent experimentally determined interactions, and the thicknesses of edges indicate the experimentally determined interaction score (Min=0.056; Max=0.998). 14 RAD D EPs were highlighted and colored by brain region. Significant differences between AsymAD vs. ADD or AsymAD vs. Ctrl in external datasets were emphasized by thicker borders. Text in boxes indicates primary genes.

a

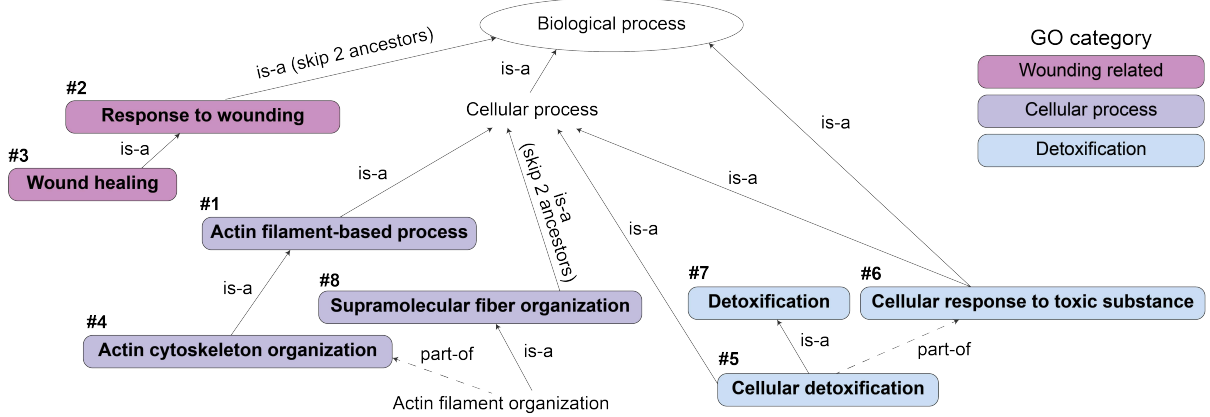

b

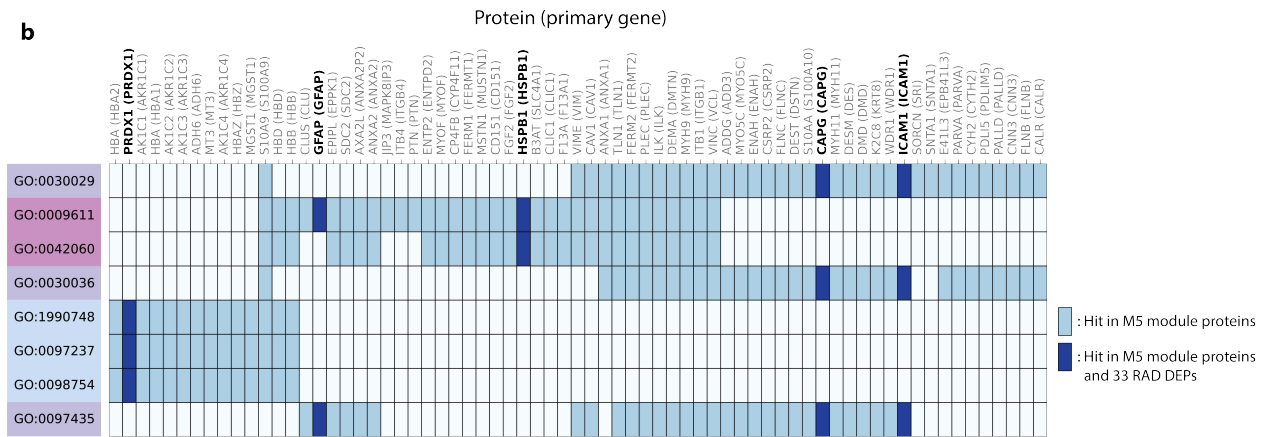

c

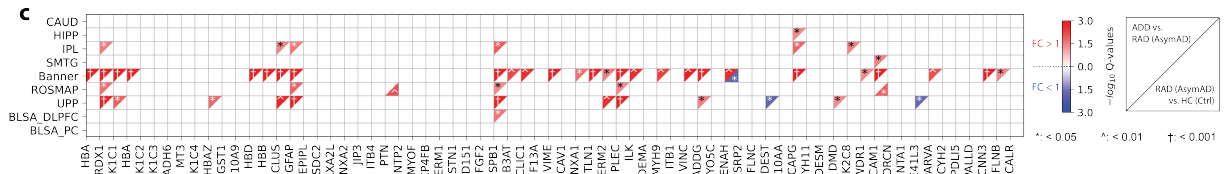

**Figure S9.** Top enriched GO biological processes in module 5. **(a)** Ancestor chart of top enriched GO biological processes in module 5. **(b)** Top 8 enriched GO biological processes with proteins hit in the M5 module. **(c)** Corresponding differential expression analysis results on ADD vs. RAD (or AsymAD) and RAD (or AsymAD) vs. HC (or Ctrl). All P-values were derived from two-sided Student's t-tests followed by the Benjamin-Hochberg procedure (FDR=0.05). Annotations: \* Adjusted P-value < 0.05; ^ Adjusted P-value < 0.01, † Adjusted P-value < 0.001.

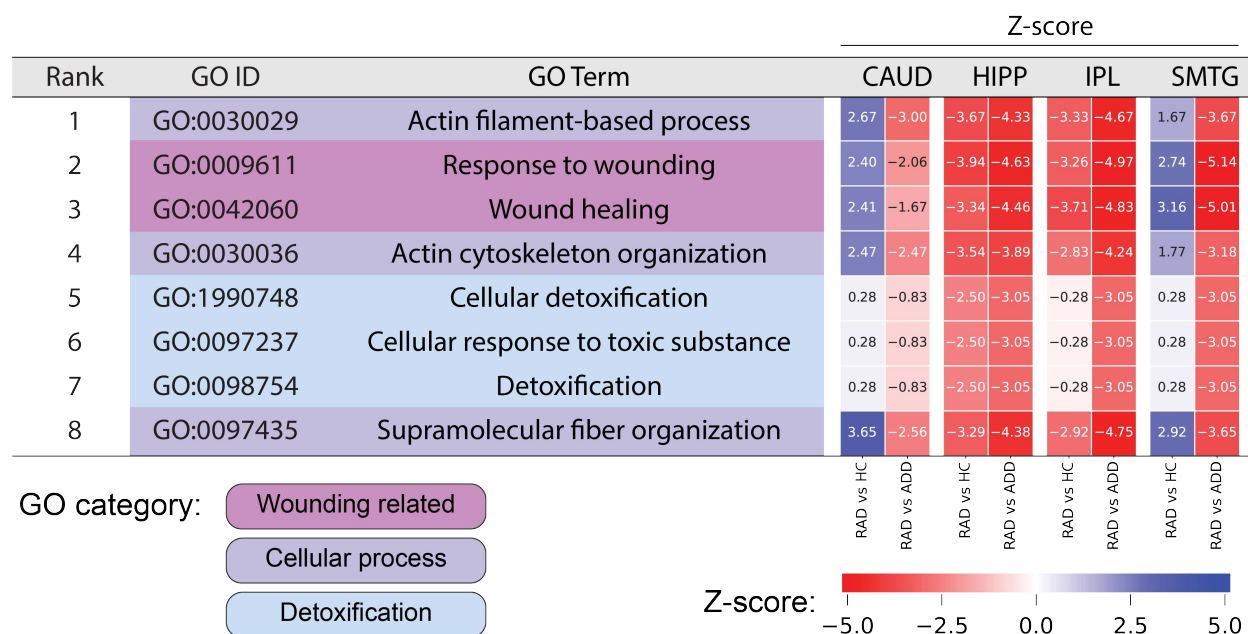

**Figure S10.** Top 3 enriched GO biological process categories in M5 and their z-scores in study cohorts. Z-scores were calculated based on the number of up/down regulated proteins from the hit count in the query, providing an overall pattern between the RAD groups and GO terms. A negative z-score means that more than half of the proteins had lower expression in RAD than HC or in RAD than ADD (fold-change < 1). Source data are provided as a Source Data file.

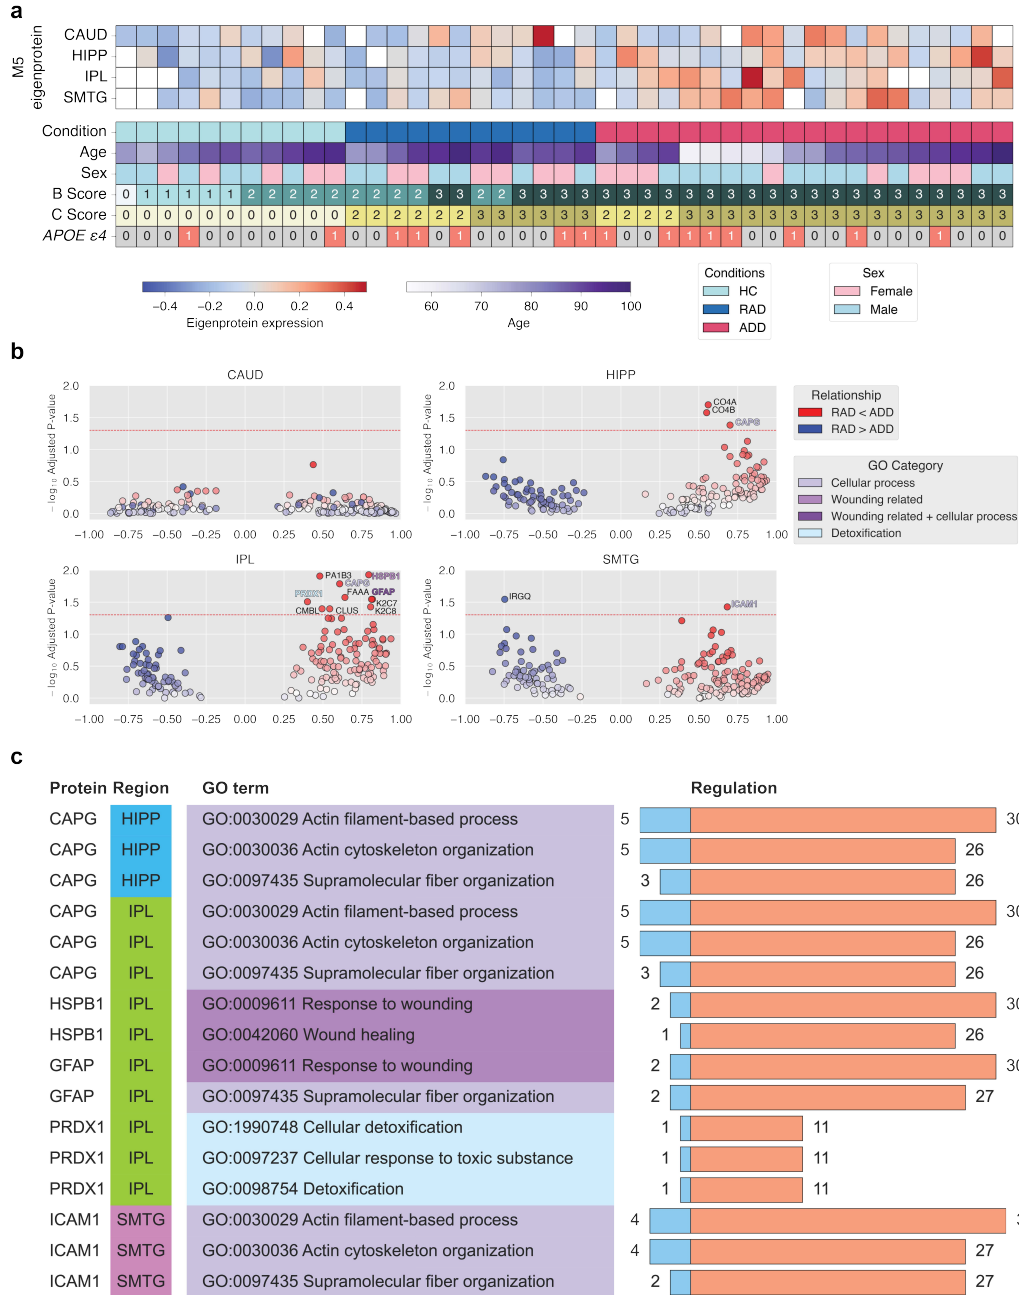

**Figure S11.** Patterns between protein expressions and M5 eigenprotein expressions. **(a)** Relationships between M5 eigenprotein expressions and clinical factors across four brain regions. Missing values were colored white. Samples are sorted by condition. **(b)** Relationships between M5 eigenprotein and module proteins. X-axis: Pearson correlation coefficient between protein expression and M5 eigenprotein expression. Y-axis:  $-\log_{10}$  adjusted P-values from two-sided Student's t-test, followed by the Benjamin-Hochberg procedure (FDR=0.05). Dashed red lines indicate the adjusted P-value = 0.05 threshold. DEPs were colored by GO categories. **(c)** Spearman correlation between 5 DEPs and the overlapping protein expressions among top GO terms. The horizontal bar plot shows the number of positive (orange) and negative (blue) correlations. Protein HBA mapped to two genes HBA1 and HBA2 in GO:1990748, GO:0097237, and GO:0098754.

| Rank | GO ID      | GO Term                                        | Hit count<br>in query | Hit count<br>in genome | Hit 33<br>RAD DEPs | Q-value<br>(FDR B&H) |
|------|------------|------------------------------------------------|-----------------------|------------------------|--------------------|----------------------|
| 1    | GO:0006091 | Generation of precursor metabolites and energy | 197                   | 594                    | 1 (AL1A1)          | 4.97E-75             |
| 2    | GO:1902600 | Proton transmembrane transport                 | 137                   | 288                    | 0                  | 1.37E-74             |
| 3    | GO:0045333 | Cellular respiration                           | 116                   | 212                    | 0                  | 1.25E-71             |
| 4    | GO:0099003 | Vesicle-mediated transport in synapse          | 133                   | 284                    | 0                  | 1.65E-71             |
| 5    | GO:0006812 | Cation transport                               | 314                   | 1458                   | 1 (FRIL)           | 5.45E-71             |
| 6    | GO:0007005 | Mitochondrion organization                     | 197                   | 629                    | 0                  | 6.33E-71             |
| 7    | GO:0099536 | Synaptic signaling                             | 266                   | 1107                   | 0                  | 9.29E-70             |
| 8    | GO:0099537 | Trans-synaptic signaling                       | 263                   | 1085                   | 0                  | 9.29E-70             |
| 9    | GO:0098916 | Anterograde trans-synaptic signaling           | 261                   | 1076                   | 0                  | 2.45E-69             |
| 10   | GO:0007268 | Chemical synaptic transmission                 | 261                   | 1076                   | 0                  | 2.45E-69             |

GO category: Synapse Energy Transport Cellular process

**Figure S12.** Top 4 enriched GO biological process categories in M1 and their enrichment analysis results. Source data are provided as a Source Data file.

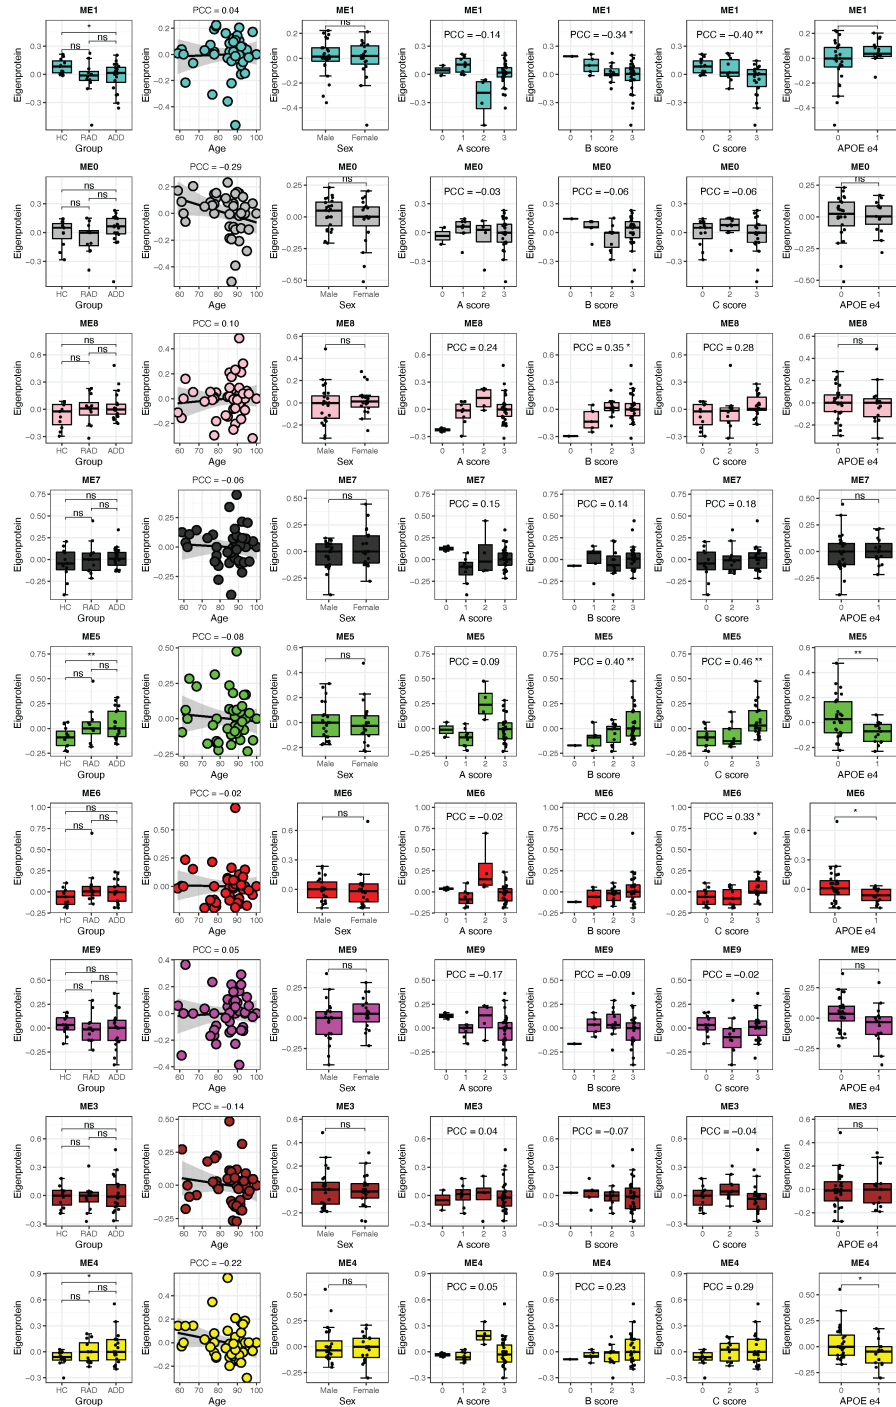

**Figure S13.** Eigenprotein expressions versus group, age, sex, A score, B score, C score, and APOE ε4 allele in CAUD. The number of samples in the study cohort: HC = 11, RES = 12, ADD = 20. All P-values were derived by two-sided Student's t-test, followed by the Benjamin-Hochberg procedure (FDR=0.05). Annotations: \* Adjusted P-value < 0.05; \*\* Adjusted P-value < 0.01, \*\*\* Adjusted P-value < 0.001, \*\*\*\* Adjusted P-value < 0.0001. For the boxplots, the interior horizontal line represents the median value, the upper and lower box edges represent the 75th and 25th percentile, and the upper and lower bars represent the 90th and 10th percentiles, respectively. Source data are provided as a Source Data file.

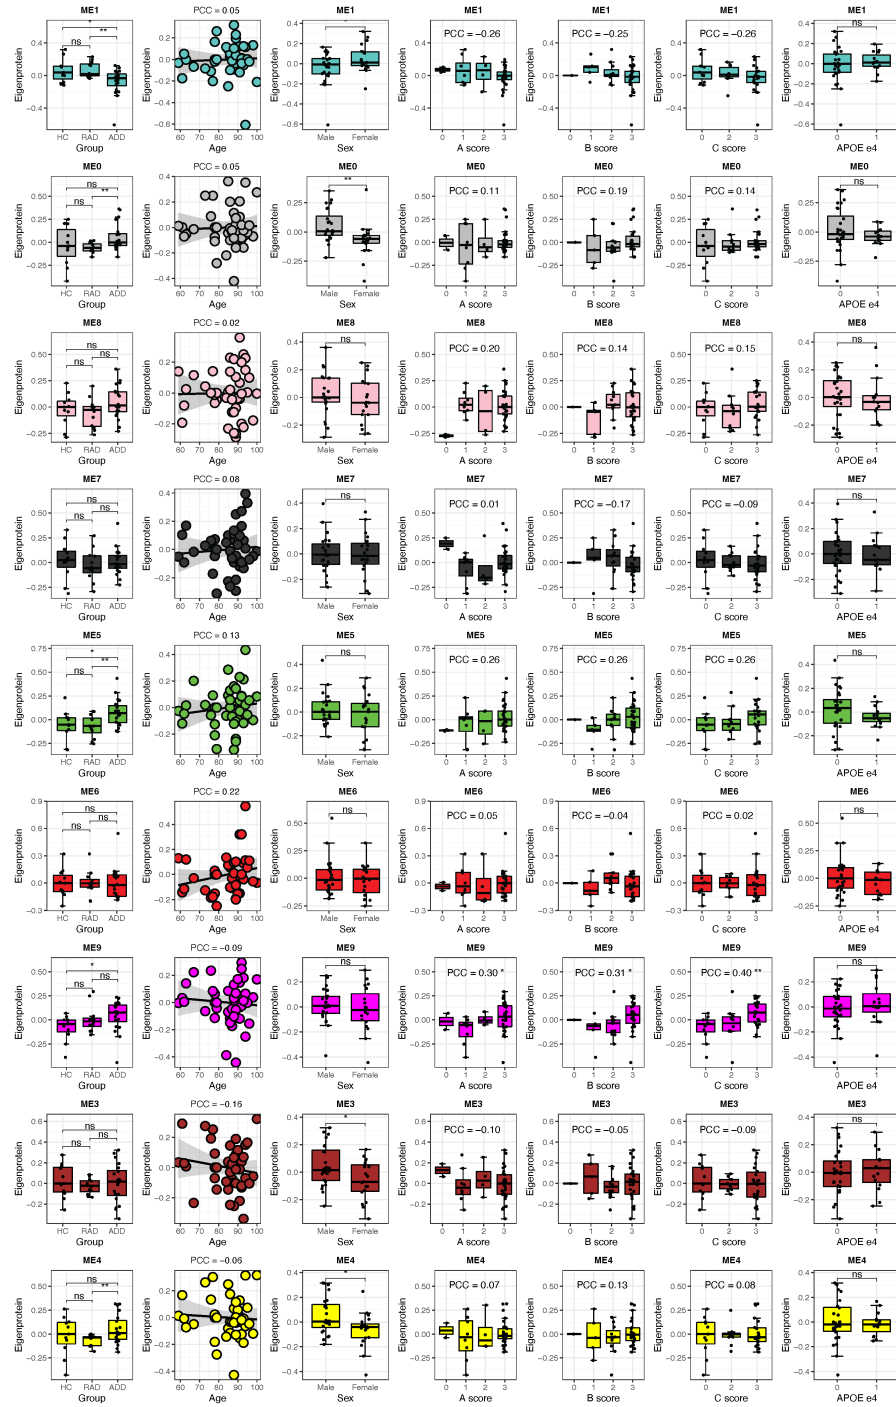

**Figure S14.** Eigenprotein expressions versus group, age, sex, A score, B score, C score, and APOE  $\epsilon 4$  allele in HIPP. The number of samples in the study cohort: HC = 11, RES = 12, ADD = 20. All P-values were derived by two-sided Student's t-test, followed by the Benjamin-Hochberg procedure (FDR=0.05). Annotations: \* Adjusted P-value < 0.05; \*\* Adjusted P-value < 0.01, \*\*\* Adjusted P-value < 0.001, \*\*\*\* Adjusted P-value < 0.0001. For the boxplots, the interior horizontal line represents the median value, the upper and lower box edges represent the 75th and 25th percentile, and the upper and lower bars represent the 90th and 10th percentile, respectively. Source data are provided as a Source Data file.

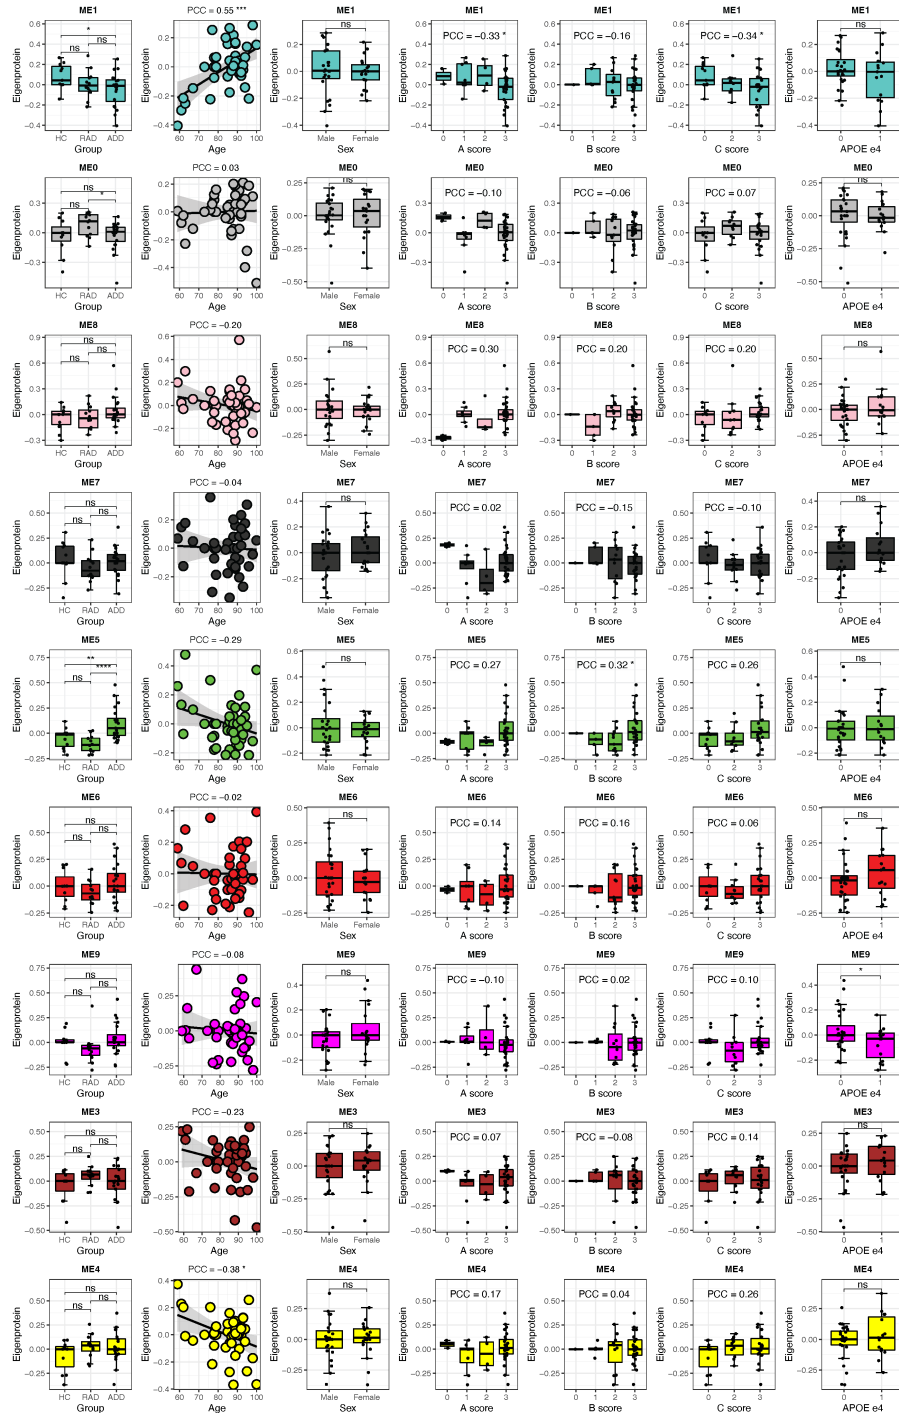

**Figure S15.** Eigenprotein expressions versus group, age, sex, A score, B score, C score, and APOE ε4 allele in IPL. The number of samples in the study cohort: HC = 11, RES = 12, ADD = 20. All P-values were derived by two-sided Student's t-test, followed by the Benjamin-Hochberg procedure (FDR=0.05). Annotations: \* Adjusted P-value < 0.05; \*\* Adjusted P-value < 0.01, \*\*\* Adjusted P-value < 0.001, \*\*\*\* Adjusted P-value < 0.0001. For the boxplots, the interior horizontal line represents the median value, the upper and lower box edges represent the 75th and 25th percentile, and the upper and lower bars represent the 90th and 10th percentile, respectively. Source data are provided as a Source Data file.

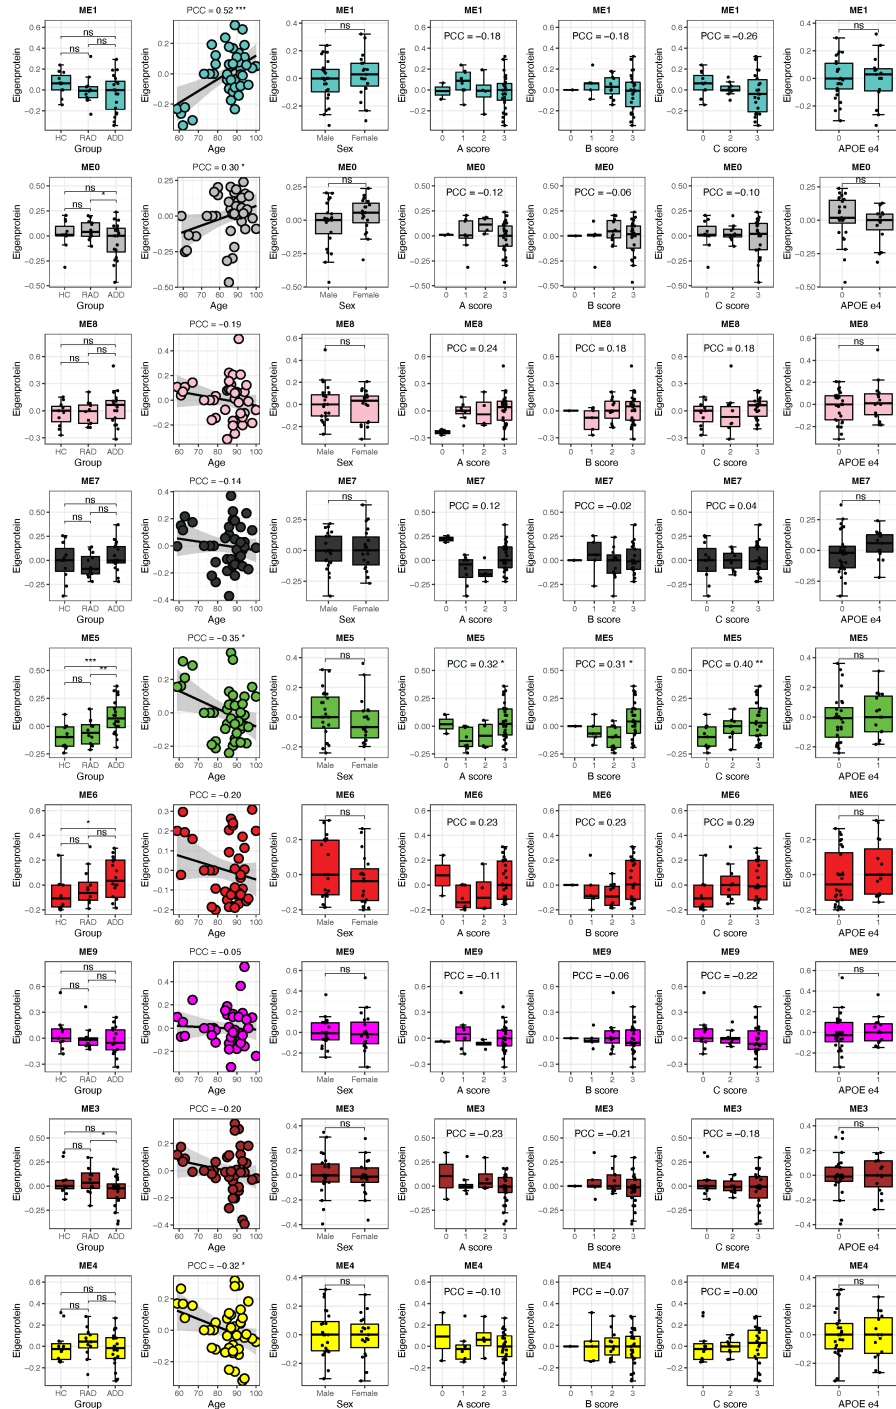

**Figure S16.** Eigenprotein expressions versus group, age, sex, A score, B score, C score, and APOE ε4 allele in SMTG. The number of samples in the study cohort: HC = 11, RES = 12, ADD = 20. All P-values were derived by two-sided Student's t-test, followed by the Benjamin-Hochberg procedure (FDR=0.05). Annotations: \* Adjusted P-value < 0.05; \*\* Adjusted P-value < 0.01, \*\*\* Adjusted P-value < 0.001, \*\*\*\* Adjusted P-value < 0.0001. For the boxplots, the interior horizontal line represents the median value, the upper and lower box edges represent the 75th and 25th percentile, and the upper and lower bars represent the 90th and 10th percentiles, respectively. Source data are provided as a Source Data file.

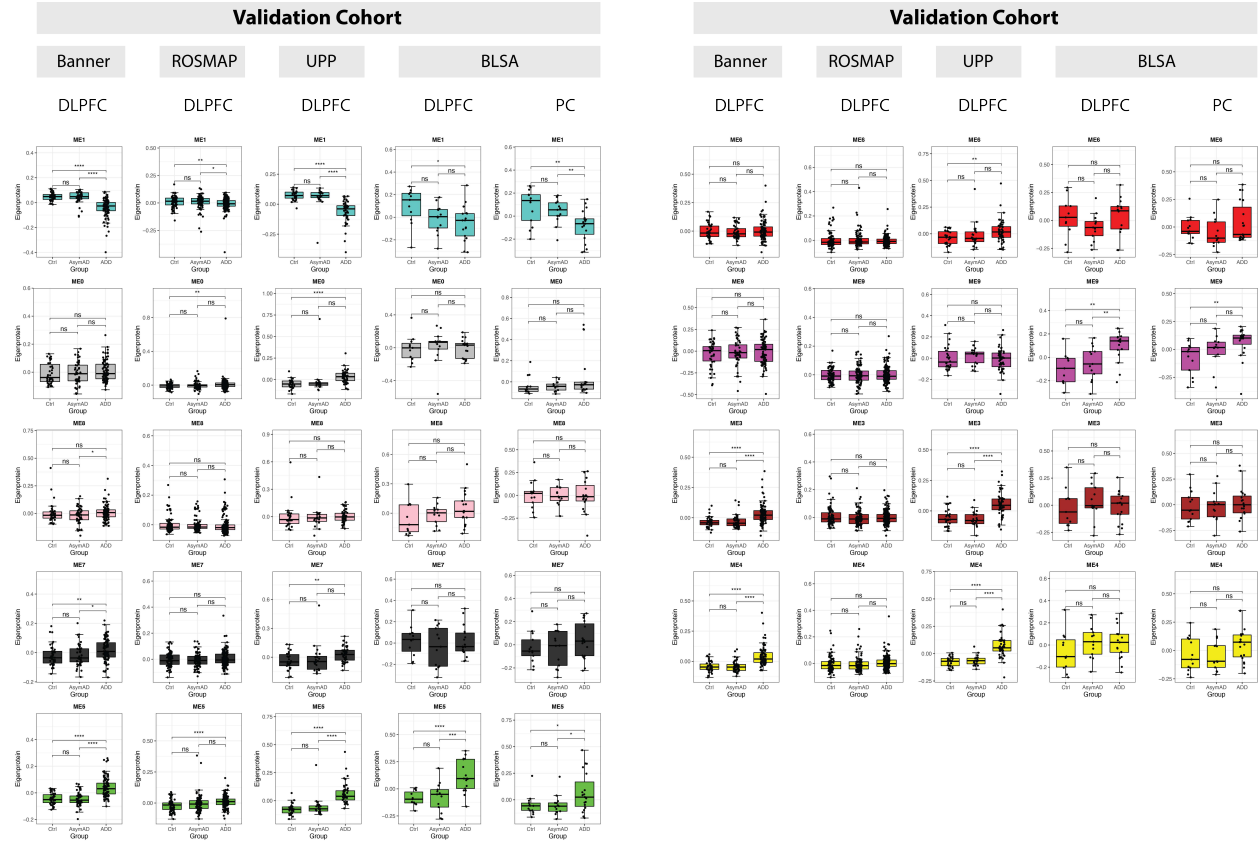

**Figure S17.** Nine co-expression modules from the study cohort were validated by external datasets. AsymAD is a mix of preclinical AD and RAD cases. Ctrl includes HC. Banner stands for Banner Sun Health Research Institute dataset; ROSMAP for Religious Orders Study and Rush Memory and Aging Project dataset; UPP for UPenn Proteomics study dataset; and BLSA for Baltimore Longitudinal Study of Aging dataset. Abbreviations: dorsolateral prefrontal cortex (DLPFC), precuneus (PC). The number of samples in the external validation cohorts: Banner (Ctrl = 42, AsymAD = 45, ADD = 92), ROSMAP (Ctrl = 78, AsymAD = 89, ADD = 162), UPP (Ctrl = 26, AsymAD = 20, ADD = 49), and BLSA (DLPFC: Ctrl = 11, AsymAD = 13, ADD = 17; PC: Ctrl = 13, AsymAD = 13, ADD = 19). All P-values were derived by two-sided Student's t-test, followed by the Benjamin-Hochberg procedure (FDR=0.05). Annotations: \* Adjusted P-value < 0.05; \*\* Adjusted P-value < 0.01, \*\*\* Adjusted P-value < 0.001, \*\*\*\* Adjusted P-value < 0.0001. For the boxplots, the interior horizontal line represents the median value, the upper and lower box edges represent the 75th and 25th percentile, and the upper and lower bars represent the 90th and 10th percentiles, respectively. Source data are provided as a Source Data file.

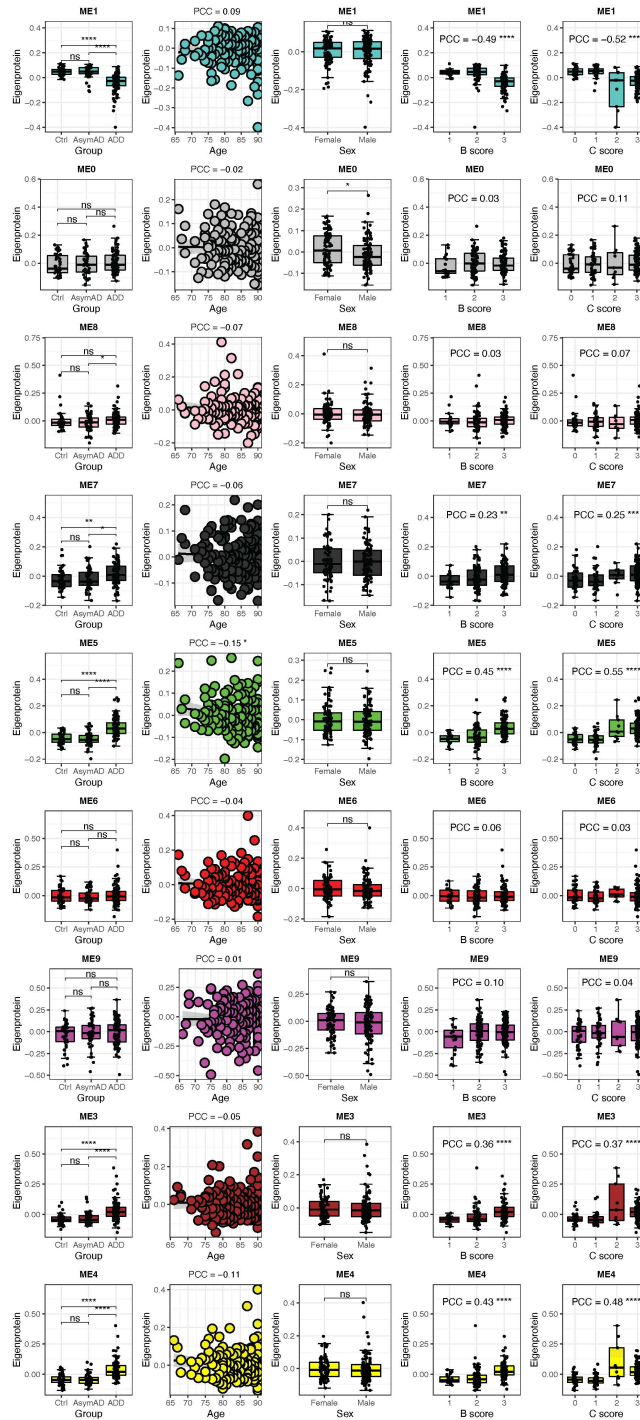

**Figure S18.** Eigenprotein expressions versus group, age, sex, B score, and C score in Banner Sun Health Research Institute (Banner) dataset dorsolateral prefrontal cortex (DLPFC). The number of samples in the Banner dataset: Ctrl = 42, AsymAD = 45, ADD = 92. All P-values were derived by two-sided Student's t-test, followed by the Benjamin-Hochberg procedure (FDR=0.05). Annotations: \* Adjusted P-value < 0.05; \*\* Adjusted P-value < 0.01, \*\*\* Adjusted P-value < 0.001, \*\*\*\* Adjusted P-value < 0.0001. For the boxplots, the interior horizontal line represents the median value, the upper and lower box edges represent the 75th and 25th percentile, and the upper and lower bars represent the 90th and 10th percentiles, respectively. Source data are provided as a Source Data file.

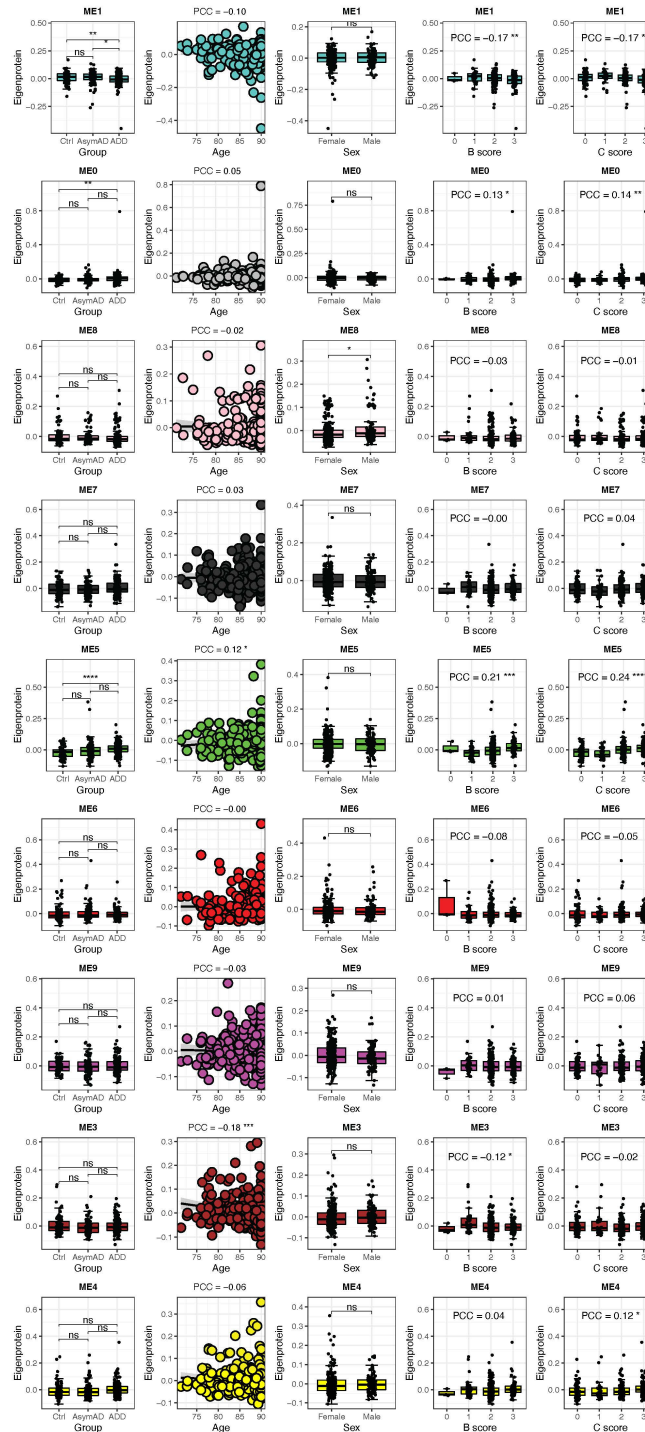

**Figure S19.** Eigenprotein expressions versus group, age, sex, B score, and C score in Religious Orders Study and Rush Memory and Aging Project (ROSMAP) dataset dorsolateral prefrontal cortex (DLPFC). The number of samples in the ROSMAP dataset: Ctrl = 78, AsymAD = 89, ADD = 162. All P-values were derived by two-sided Student's t-test, followed by the Benjamin-Hochberg procedure (FDR=0.05). Annotations: \* Adjusted P-value < 0.05; \*\* Adjusted P-value < 0.01, \*\*\* Adjusted P-value < 0.001, \*\*\*\* Adjusted P-value < 0.0001. For the boxplots, the interior horizontal line represents the median value, the upper and lower box edges represent the 75th and 25th percentile, and the upper and lower bars represent the 90th and 10th percentiles, respectively. Source data are provided as a Source Data file.

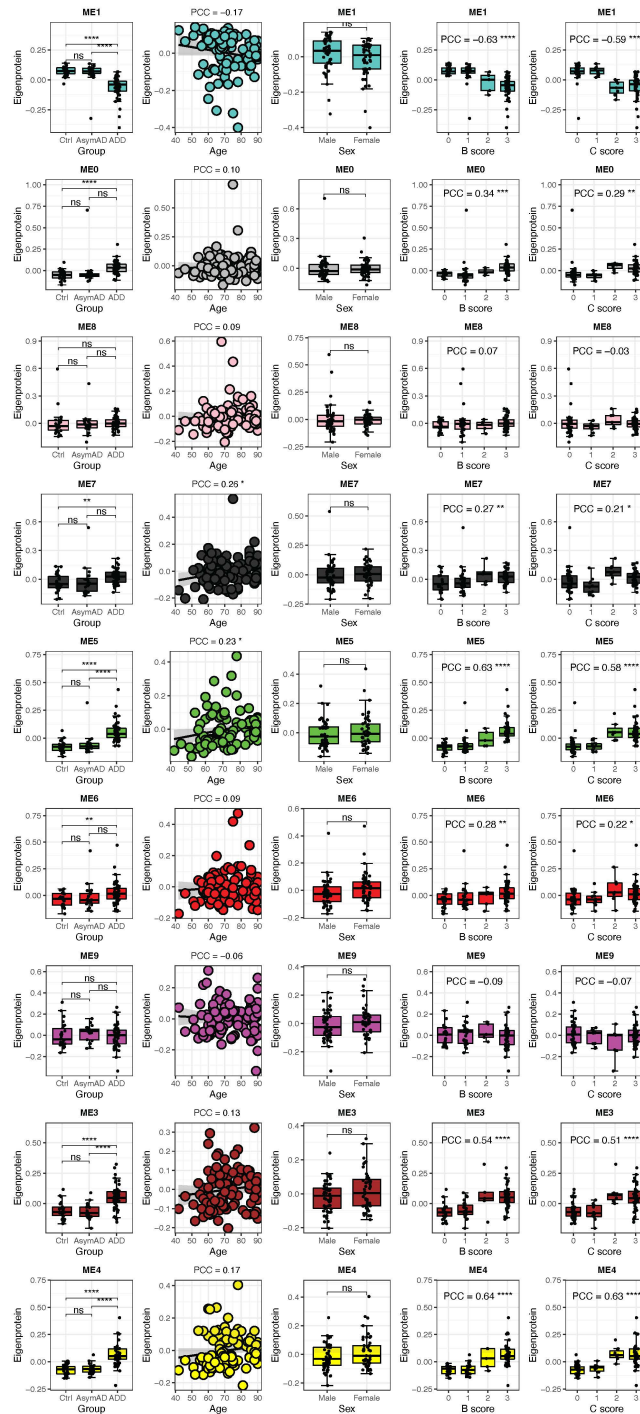

**Figure S20.** Eigenprotein expressions versus group, age, sex, B score, and C score in UPenn Proteomics study (UPP) dataset dorsolateral prefrontal cortex (DLPFC). The number of samples in the UPP dataset: Ctrl = 26, AsymAD = 20, ADD = 49. All P-values were derived by two-sided Student's t-test, followed by the Benjamin-Hochberg procedure (FDR=0.05). Annotations: \* Adjusted P-value < 0.05; \*\* Adjusted P-value < 0.01, \*\*\* Adjusted P-value < 0.001, \*\*\*\* Adjusted P-value < 0.0001. For the boxplots, the interior horizontal line represents the median value, the upper and lower box edges represent the 75th and 25th percentile, and the upper and lower bars represent the 90th and 10th percentiles, respectively. Source data are provided as a Source Data file.

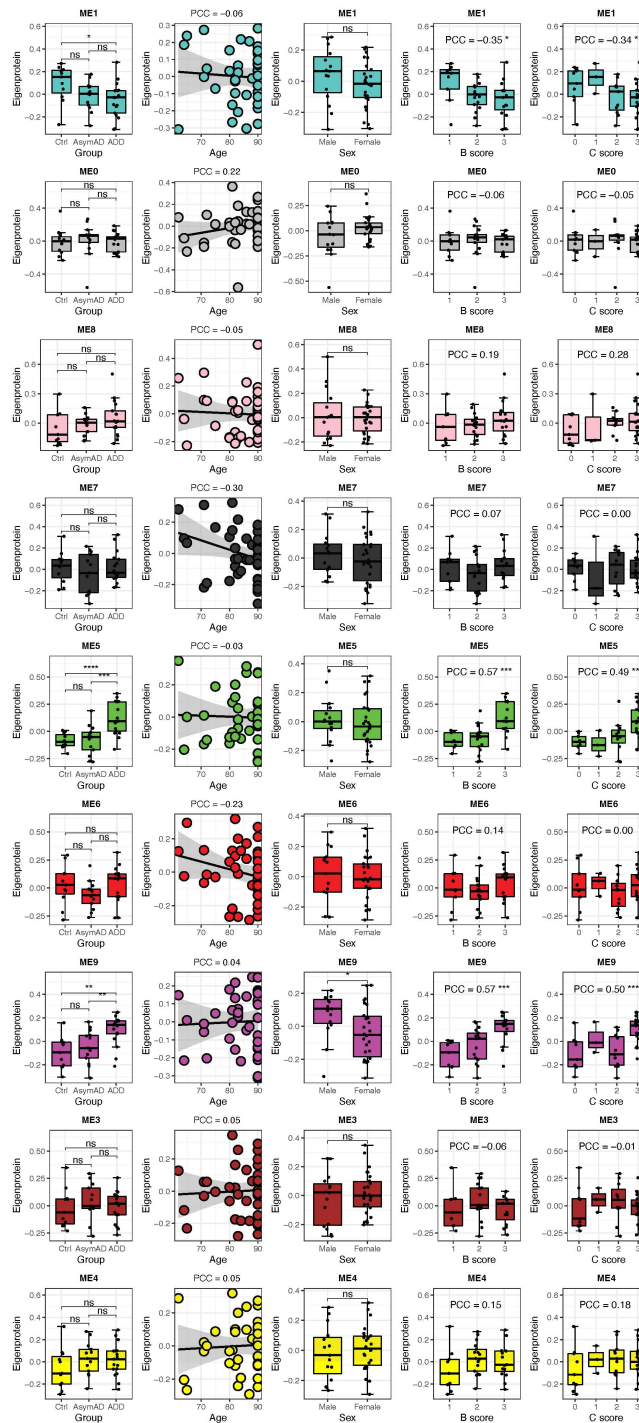

**Figure S21.** Eigenprotein expressions versus group, age, sex, B score, and C score in Baltimore Longitudinal Study of Aging (BLSA) dataset dorsolateral prefrontal cortex (DLPFC). The number of samples in the BLSA DLPFC dataset: Ctrl = 11, AsymAD = 13, ADD = 17. All P-values were derived by two-sided Student's t-test, followed by the Benjamin-Hochberg procedure (FDR=0.05). Annotations: \* Adjusted P-value < 0.05; \*\* Adjusted P-value < 0.01, \*\*\* Adjusted P-value < 0.001, \*\*\*\* Adjusted P-value < 0.0001. For the boxplots, the interior horizontal line represents the median value, the upper and lower box edges represent the 75th and 25th percentile, and the upper and lower bars represent the 90th and 10th percentiles, respectively. Source data are provided as a Source Data file.

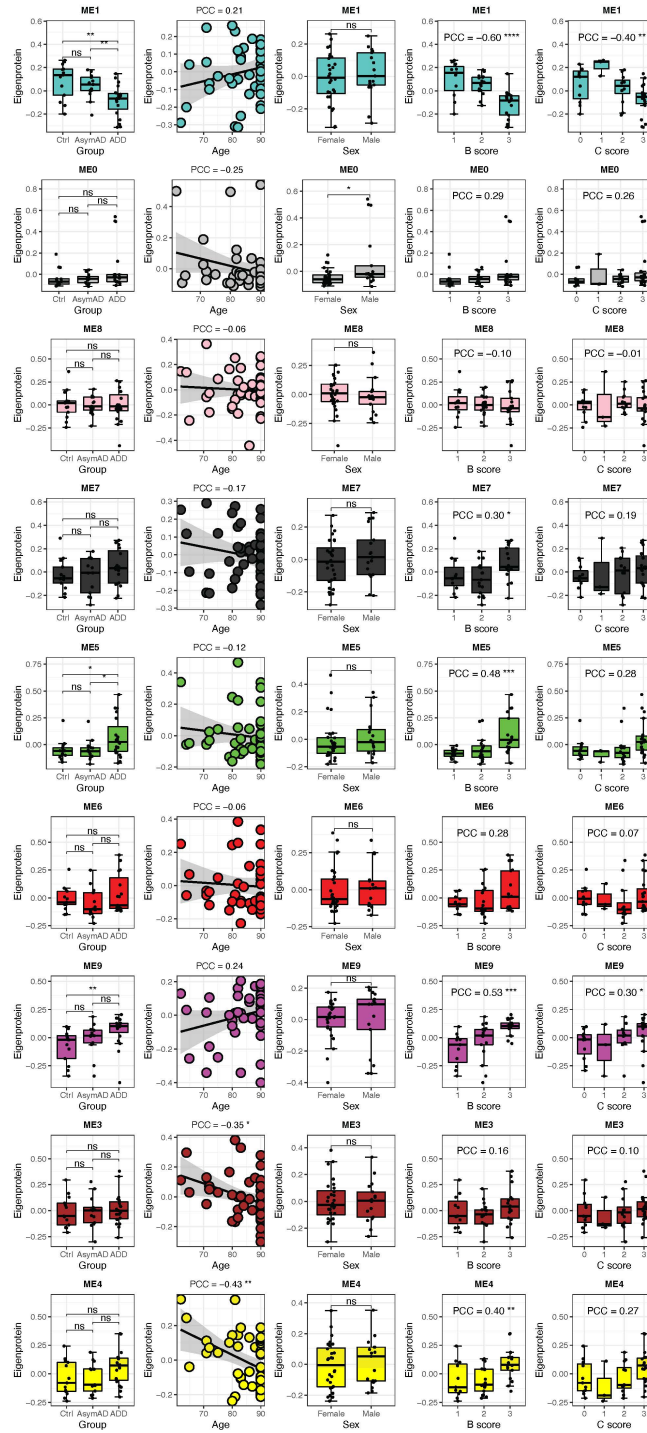

**Figure S22.** Eigenprotein expressions versus group, age, sex, B score, and C score in Baltimore Longitudinal Study of Aging (BLSA) dataset precuneus (PC) region. The number of samples in the BLSA PC dataset: Ctrl = 13, AsymAD = 13, ADD = 19. All P-values were derived by two-sided Student's t-test, followed by the Benjamin-Hochberg procedure (FDR=0.05). Annotations: \* Adjusted P-value < 0.05; \*\* Adjusted P-value < 0.01, \*\*\* Adjusted P-value < 0.001, \*\*\*\* Adjusted P-value < 0.0001. For the boxplots, the interior horizontal line represents the median value, the upper and lower box edges represent the 75th and 25th percentile, and the upper and lower bars represent the 90th and 10th percentiles, respectively. Source data are provided as a Source Data file.
